# Supplementary material for: Mixed-method estimation of population-level HIV viral suppression rate in the Western Cape, South Africa
Source: PubMed Central journal article supplement — BMJ Glob Health. 2020 Aug 18;5(8):e002522. doi: 10.1136/bmjgh-2020-002522 (PMC7437711; doi:10.1136/bmjgh-2020-002522), 2020-08-18
Supplement: bmjgh-2020-002522supp001.pdf [file bmjgh-2020-002522supp001.pdf]

ONLINE SUPPLEMENT TO: Mixed method estimation of population level HIV viral suppression rate in the Western Cape, South Africa

**Authors:**

Elton Mukonda MPhil<sup>1</sup>, Nei-Yuan Hsiao<sup>2,3</sup>, Lara Vojnov PhD<sup>4</sup>, Landon Myer PhD<sup>1,5</sup>, Maia Lesosky PhD<sup>1</sup>

**Affiliations:**

<sup>1</sup>Division of Epidemiology & Biostatistics, School of Public Health & Family Medicine, University of Cape Town, Cape Town, South Africa;

<sup>2</sup>National Health Laboratory Services, Cape Town, South Africa;

<sup>3</sup>Division of Medical Virology, Faculty of Health Sciences, University of Cape Town, Cape Town, South Africa;

<sup>4</sup>World Health Organization, Geneva, Switzerland;

<sup>5</sup>Centre for Infectious Disease Epidemiology & Research, School of Public Health & Family Medicine, University of Cape Town, Cape Town, South Africa;

**Correspondence address:**

Maia Lesosky, Division of Epidemiology & Biostatistics, School of Public Health & Family Medicine, University of Cape Town Faculty of Health Sciences, Anzio Road, Observatory 7925, South Africa. Email: [maia.lesosky@uct.ac.za](mailto:maia.lesosky@uct.ac.za); Phone: +27612504532

## SUPPLEMENT METHODS

### Data processing and record linkage

#### *Data cleaning and preparation stage*

The cleaning process includes trimming of blank spaces, removal of titles in name fields, removal of special characters, splitting of multiple given names in one variable into multiple variables, joining of surnames with prefixes into one name, converting all string variables to lower case and standardization of date formats.

#### *Exact linkage stage*

As movement between facilities is likely, the viral load tests for each individual were identified using the patient name, year of birth, gender and in some cases, existing patient identifiers. The main steps included creating four separate datasets based on the aggregate number of tests corresponding to each grouping of the reported patient identifier, and the combination of the last name and the first name initials. These datasets were dataset 1: Matching totals after grouping for the patient identifier and for the combination of the last name, and first name initial ( $\geq 2$  tests); dataset 2: Matching totals after grouping for the patient identifier and for the combination of the last name, and first name initial (1 test); dataset 3: Non-matching totals after grouping for the patient identifier and for the combination of the last name, and first name initial; dataset 4: No patient identifier.

Using dataset 1 as the reference, pairwise evaluations between the reference set and the comparative data sets were made and similarity scores using the Jaro-Winkler (JW) algorithm [1] and hierarchical clustering using the Jaro-Winkler distance metric were calculated for first names, second names independently. Scores were combined, and any score above a specified threshold was used to indicate a match. Comparing the names from dataset 1 to matched names in datasets 2-4, records were then classified as exact matches, probable matches, plausible matches, and non-matches. For example, records were exact matches if they had a summary similarity score of 1, the same year of birth, gender, and were taken from the same healthcare facility.

Records were determined to be from the same individual if the total similarity score was above a threshold value, the difference between the years of birth was not more than 3-years and gender was the same for the two entities. Matches were integrated into the reference set, and

the algorithm run iteratively until no further matches could be identified. Unique identifiers are assigned to all matched records and all remaining records for which insufficient data exists for any type of meaningful linking to be possible. The same procedure was performed for comparing names from dataset 2 vs 3-4 (dataset 2 as the reference), and then for dataset 3 vs 4 (dataset 3 as the reference). Hierarchical clustering was used for classifying the remaining records in dataset 4.

**Supplement Table 1:** Summary and comparison of test-level and person-level viral suppression (VL<400 copies/mL) between 2008 and 2018 for all tests and for individuals in care, disaggregated by sex.

| Year | Male                       |                                         | Females                    |                                         | Overall                    |                                         |
|------|----------------------------|-----------------------------------------|----------------------------|-----------------------------------------|----------------------------|-----------------------------------------|
|      | Tests <400 copies/mL N (%) | Individuals with VL<400 copies/mL N (%) | Tests <400 copies/mL N (%) | Individuals with VL<400 copies/mL N (%) | Tests <400 copies/mL N (%) | Individuals with VL<400 copies/mL N (%) |
| 2008 | 14167(81.3)                | 10479(82.1)                             | 27814(82.5)                | 20716(83.8)                             | 41981(82.1)                | 31195(83.2)                             |
| 2009 | 26156(82.1)                | 16142(81.8)                             | 51986(83.6)                | 31720(83.9)                             | 78142(83.1)                | 47862(83.2)                             |
| 2010 | 25581(80.7)                | 19252(82.9)                             | 50053(81.4)                | 37706(83.8)                             | 75634(81.2)                | 56958(83.5)                             |
| 2011 | 32761(76.6)                | 26330(81.9)                             | 65585(77.3)                | 52705(83.1)                             | 98346(77)                  | 79035(82.7)                             |
| 2012 | 40673(78.5)                | 33426(83.2)                             | 83376(80.4)                | 68338(85.5)                             | 124049(79.8)               | 101764(84.7)                            |
| 2013 | 49262(78.5)                | 40214(83.7)                             | 101471(80.1)               | 83787(85.6)                             | 150733(79.5)               | 124001(85)                              |
| 2014 | 50515(78.6)                | 43153(83.9)                             | 111995(81.3)               | 94042(86.2)                             | 162510(80.4)               | 137195(85.5)                            |
| 2015 | 59449(79.6)                | 51397(84.5)                             | 138215(82.9)               | 114684(87.2)                            | 197664(81.9)               | 166081(86.4)                            |
| 2016 | 70554(80.3)                | 61199(85.8)                             | 161286(83.2)               | 132835(88.1)                            | 231839(82.3)               | 194034(87.4)                            |
| 2017 | 76561(80.9)                | 67864(86.3)                             | 177907(84.2)               | 148875(88.8)                            | 254468(83.2)               | 216739(88)                              |
| 2018 | 62346(82.6)                | 59317(86.5)                             | 143828(85.5)               | 130980(88.8)                            | 206174(84.6)               | 190297(88.1)                            |

**Supplement Table 2:** Summary and comparison of test-level and person level viral suppression (VL<1000 copies/mL) between 2008 and 2018 disaggregated for individuals <25 years.

| Age     | <12 months                  |                                          | 12-23 months                |                                          | 24-59 months                |                                          | 5-14 years                  |                                          | 15-24 years                 |                                          |
|---------|-----------------------------|------------------------------------------|-----------------------------|------------------------------------------|-----------------------------|------------------------------------------|-----------------------------|------------------------------------------|-----------------------------|------------------------------------------|
| Year    | Tests <1000 copies/mL N (%) | Individuals with VL<1000 copies/mL N (%) | Tests <1000 copies/mL N (%) | Individuals with VL<1000 copies/mL N (%) | Tests <1000 copies/mL N (%) | Individuals with VL<1000 copies/mL N (%) | Tests <1000 copies/mL N (%) | Individuals with VL<1000 copies/mL N (%) | Tests <1000 copies/mL N (%) | Individuals with VL<1000 copies/mL N (%) |
| 2008    | 279(38.3)                   | 201(36.8)                                | 403(63.5)                   | 288(64.1)                                | 1395(73.5)                  | 1033(76.6)                               | 2496(80.1)                  | 1854(82.5)                               | 1947(77.4)                  | 1497(78.4)                               |
| 2009    | 404(41.4)                   | 270(41.6)                                | 630(65.5)                   | 384(65.3)                                | 2037(78)                    | 1205(78.8)                               | 4424(82.6)                  | 2594(82.7)                               | 3754(79.8)                  | 2403(79.8)                               |
| 2010    | 287(36.9)                   | 204(36.5)                                | 526(67.3)                   | 372(69.8)                                | 1590(76.2)                  | 1187(78.5)                               | 3988(81.1)                  | 2927(84.3)                               | 3658(77.4)                  | 2742(78.7)                               |
| 2011    | 225(31.9)                   | 147(32.7)                                | 521(58)                     | 382(63.2)                                | 1696(70.8)                  | 1325(76.7)                               | 4703(77.2)                  | 3718(83.4)                               | 5166(72.4)                  | 3958(76.5)                               |
| 2012    | 233(32.2)                   | 159(35.1)                                | 406(51.9)                   | 301(58.6)                                | 1652(69.1)                  | 1336(76.1)                               | 5099(79)                    | 4139(84.4)                               | 6961(76.7)                  | 5561(80.7)                               |
| 2013    | 223(30.8)                   | 149(32.5)                                | 374(50.3)                   | 261(56.4)                                | 1647(69)                    | 1269(75.8)                               | 5632(78)                    | 4560(84.6)                               | 8678(74.8)                  | 7003(79.5)                               |
| 2014    | 189(29.8)                   | 133(31.7)                                | 366(51.3)                   | 271(56)                                  | 1446(68.1)                  | 1107(73.5)                               | 5390(78)                    | 4477(84)                                 | 10966(76.8)                 | 8703(80.6)                               |
| 2015    | 317(49.7)                   | 218(57.8)                                | 381(50.1)                   | 269(55.3)                                | 1387(69.1)                  | 1048(74.3)                               | 5804(78.4)                  | 4915(85)                                 | 14204(80)                   | 10856(83.7)                              |
| 2016    | 241(61)                     | 202(66.9)                                | 220(47.4)                   | 156(52.5)                                | 1296(66.4)                  | 1003(74.5)                               | 5977(78.9)                  | 5167(86.2)                               | 15623(80.6)                 | 11924(84.7)                              |
| 2017    | 198(65.6)                   | 156(69.6)                                | 251(51.2)                   | 180(57)                                  | 1103(63.2)                  | 873(70.2)                                | 5912(78.3)                  | 5196(86.6)                               | 17365(81.3)                 | 13449(85)                                |
| 2018    | 158(63.7)                   | 133(68.2)                                | 182(53.4)                   | 148(59)                                  | 760(64.5)                   | 671(70.6)                                | 4372(80.6)                  | 4092(85.3)                               | 13542(81.7)                 | 11764(85.3)                              |
| Overall | 2754(40.2)                  | 1972(42.6)                               | 4260(56.2)                  | 3012(60.4)                               | 16009(70.3)                 | 12057(75.3)                              | 53797(79.1)                 | 43639(84.7)                              | 101864(78.9)                | 79860(82.6)                              |

**Supplement Table 3:** Summary and comparison of test-level and person level viral suppression (VL<1000 copies/mL) between 2008 and 2018 disaggregated for individuals > 25 years.

| Year    | 25-34 years                 |                                          | 35-44 years                 |                                          | 45-54 years                 |                                          | 55-64 years                 |                                          | 65+ years                   |                                          |
|---------|-----------------------------|------------------------------------------|-----------------------------|------------------------------------------|-----------------------------|------------------------------------------|-----------------------------|------------------------------------------|-----------------------------|------------------------------------------|
|         | Tests <1000 copies/mL N (%) | Individuals with VL<1000 copies/mL N (%) | Tests <1000 copies/mL N (%) | Individuals with VL<1000 copies/mL N (%) | Tests <1000 copies/mL N (%) | Individuals with VL<1000 copies/mL N (%) | Tests <1000 copies/mL N (%) | Individuals with VL<1000 copies/mL N (%) | Tests <1000 copies/mL N (%) | Individuals with VL<1000 copies/mL N (%) |
| 2008    | 16030(85.3)                 | 11860(86.1)                              | 14163(87.6)                 | 10510(88.5)                              | 5113(89.2)                  | 3738(89.7)                               | 1225(91.6)                  | 896(91.5)                                | 202(95.3)                   | 158(94)                                  |
| 2009    | 29603(85.7)                 | 18097(85.7)                              | 27119(88.2)                 | 16612(88.2)                              | 10082(90.4)                 | 6190(90.2)                               | 2384(91.9)                  | 1443(92.4)                               | 386(93.9)                   | 254(92.7)                                |
| 2010    | 28344(83.5)                 | 21131(85.1)                              | 26875(86.7)                 | 20151(88.2)                              | 10456(88.8)                 | 7769(89.9)                               | 2478(90.5)                  | 1837(91.6)                               | 393(91.8)                   | 290(92.1)                                |
| 2011    | 35839(78.1)                 | 28404(83.5)                              | 35398(81.5)                 | 28576(86.6)                              | 14081(84.8)                 | 11221(88.9)                              | 3354(87)                    | 2720(91)                                 | 562(88.4)                   | 448(90.1)                                |
| 2012    | 45163(81.6)                 | 36496(86.2)                              | 45338(84)                   | 37189(88.4)                              | 17882(85.9)                 | 14698(89.5)                              | 4453(88.2)                  | 3657(91.3)                               | 769(87.8)                   | 630(89.6)                                |
| 2013    | 54147(81)                   | 43922(85.9)                              | 55659(84)                   | 45550(88.7)                              | 22315(85.8)                 | 18426(89.9)                              | 5830(88)                    | 4819(91.7)                               | 1046(89.3)                  | 869(92.3)                                |
| 2014    | 59080(82.5)                 | 48327(86.7)                              | 58641(84.8)                 | 49988(89.1)                              | 23970(85.7)                 | 20646(89.8)                              | 6480(88)                    | 5583(91.2)                               | 1123(89.2)                  | 973(91.5)                                |
| 2015    | 70128(84.2)                 | 56490(87.8)                              | 71672(85.9)                 | 61138(89.7)                              | 29943(85.8)                 | 26296(89.7)                              | 8423(88.4)                  | 7359(91.3)                               | 1452(87.6)                  | 1280(89.6)                               |
| 2016    | 79631(84.5)                 | 62895(88.5)                              | 85587(86)                   | 72677(90.5)                              | 37596(86.2)                 | 33004(90.7)                              | 10948(88.2)                 | 9578(92.2)                               | 1978(88.8)                  | 1732(92.7)                               |
| 2017    | 84405(85.4)                 | 67790(89.2)                              | 94034(86.7)                 | 81374(91)                                | 43571(86.9)                 | 38855(91.2)                              | 12880(89.1)                 | 11506(92.4)                              | 2413(90.4)                  | 2155(93.5)                               |
| 2018    | 65137(86.3)                 | 57477(89.2)                              | 77355(88)                   | 72144(91.1)                              | 37033(88.5)                 | 35388(91.5)                              | 11048(89.2)                 | 10596(92)                                | 2184(91.5)                  | 2081(94)                                 |
| Overall | 567507(83.6)                | 452889(87.3)                             | 591841(85.8)                | 495909(89.7)                             | 252042(86.7)                | 216231(90.4)                             | 69503(88.7)                 | 59994(91.8)                              | 12508(89.8)                 | 10870(92.3)                              |

**Supplement Table 4:** Summary and comparison of test-level and person level viral suppression (VL<400 copies/mL) between 2008 and 2018 disaggregated for individuals <25 years.

| Year    | <12 months                 |                                         | 12-23 months               |                                         | 24-59 months               |                                         | 5-14 years                 |                                         | 15-24 years                |                                         |
|---------|----------------------------|-----------------------------------------|----------------------------|-----------------------------------------|----------------------------|-----------------------------------------|----------------------------|-----------------------------------------|----------------------------|-----------------------------------------|
|         | Tests <400 copies/mL N (%) | Individuals with VL<400 copies/mL N (%) | Tests <400 copies/mL N (%) | Individuals with VL<400 copies/mL N (%) | Tests <400 copies/mL N (%) | Individuals with VL<400 copies/mL N (%) | Tests <400 copies/mL N (%) | Individuals with VL<400 copies/mL N (%) | Tests <400 copies/mL N (%) | Individuals with VL<400 copies/mL N (%) |
| 2008    | 267(36.6)                  | 192(35.2)                               | 381(60)                    | 273(60.8)                               | 1335(70.4)                 | 994(73.7)                               | 2402(77.1)                 | 1785(79.4)                              | 1869(74.3)                 | 1438(75.3)                              |
| 2009    | 365(37.4)                  | 250(38.5)                               | 593(61.6)                  | 358(60.9)                               | 1960(75.1)                 | 1159(75.8)                              | 4239(79.2)                 | 2478(79)                                | 3587(76.2)                 | 2299(76.4)                              |
| 2010    | 255(32.8)                  | 186(33.3)                               | 476(60.9)                  | 350(65.7)                               | 1493(71.5)                 | 1141(75.4)                              | 3793(77.1)                 | 2832(81.5)                              | 3492(73.9)                 | 2633(75.6)                              |
| 2011    | 193(27.3)                  | 133(29.6)                               | 457(50.8)                  | 346(57.3)                               | 1596(66.6)                 | 1269(73.5)                              | 4513(74.1)                 | 3622(81.2)                              | 4983(69.8)                 | 3841(74.3)                              |
| 2012    | 209(28.9)                  | 146(32.2)                               | 362(46.2)                  | 282(54.9)                               | 1535(64.2)                 | 1270(72.3)                              | 4851(75.2)                 | 3998(81.6)                              | 6737(74.2)                 | 5413(78.5)                              |
| 2013    | 187(25.8)                  | 125(27.3)                               | 328(44.1)                  | 240(51.8)                               | 1539(64.5)                 | 1215(72.6)                              | 5371(74.3)                 | 4416(82)                                | 8333(71.8)                 | 6786(77.1)                              |
| 2014    | 163(25.7)                  | 117(27.9)                               | 317(44.4)                  | 243(50.2)                               | 1348(63.5)                 | 1067(70.8)                              | 5070(73.4)                 | 4310(80.9)                              | 10560(73.9)                | 8442(78.2)                              |
| 2015    | 281(44)                    | 206(54.6)                               | 344(45.2)                  | 247(50.8)                               | 1268(63.1)                 | 988(70)                                 | 5517(74.5)                 | 4759(82.3)                              | 13658(76.9)                | 10517(81.1)                             |
| 2016    | 229(58)                    | 196(64.9)                               | 201(43.3)                  | 148(49.8)                               | 1191(61)                   | 947(70.3)                               | 5671(74.9)                 | 4999(83.4)                              | 15034(77.6)                | 11558(82.1)                             |
| 2017    | 184(60.9)                  | 152(67.9)                               | 224(45.7)                  | 166(52.5)                               | 1015(58.2)                 | 820(66)                                 | 5624(74.5)                 | 5036(83.9)                              | 16687(78.1)                | 13003(82.2)                             |
| 2018    | 151(60.9)                  | 127(65.1)                               | 163(47.8)                  | 138(55)                                 | 695(58.9)                  | 616(64.8)                               | 4139(76.3)                 | 3924(81.8)                              | 13011(78.5)                | 11371(82.4)                             |
| Overall | 2484(36.2)                 | 1830(39.6)                              | 3846(50.8)                 | 2791(56)                                | 14975(65.8)                | 11486(71.7)                             | 51190(75.3)                | 42159(81.9)                             | 97951(75.8)                | 77301(79.9)                             |

**Supplement Table 5:** Summary and comparison of test-level and person level viral suppression (VL<400 copies/mL) between 2008 and 2018 disaggregated for individuals > 25 years.

| Year    | 25-34 years                |                                         | 35-44 years                |                                         | 45-54 years                |                                         | 55-64 years                |                                         | 65+ years                  |                                         |
|---------|----------------------------|-----------------------------------------|----------------------------|-----------------------------------------|----------------------------|-----------------------------------------|----------------------------|-----------------------------------------|----------------------------|-----------------------------------------|
|         | Tests <400 copies/mL N (%) | Individuals with VL<400 copies/mL N (%) | Tests <400 copies/mL N (%) | Individuals with VL<400 copies/mL N (%) | Tests <400 copies/mL N (%) | Individuals with VL<400 copies/mL N (%) | Tests <400 copies/mL N (%) | Individuals with VL<400 copies/mL N (%) | Tests <400 copies/mL N (%) | Individuals with VL<400 copies/mL N (%) |
| 2008    | 15481(82.4)                | 11508(83.5)                             | 13826(85.5)                | 10291(86.6)                             | 5019(87.6)                 | 3676(88.2)                              | 1201(89.8)                 | 881(90)                                 | 200(94.3)                  | 157(93.5)                               |
| 2009    | 28526(82.6)                | 17460(82.7)                             | 26330(85.6)                | 16161(85.8)                             | 9832(88.2)                 | 6038(88)                                | 2336(90)                   | 1412(90.4)                              | 374(91)                    | 247(90.1)                               |
| 2010    | 27263(80.3)                | 20478(82.4)                             | 25981(83.8)                | 19668(86.1)                             | 10097(85.7)                | 7586(87.8)                              | 2400(87.7)                 | 1799(89.7)                              | 384(89.7)                  | 285(90.5)                               |
| 2011    | 34700(75.6)                | 27707(81.5)                             | 34396(79.2)                | 28008(84.9)                             | 13690(82.4)                | 10991(87)                               | 3274(84.9)                 | 2677(89.6)                              | 544(85.5)                  | 441(88.7)                               |
| 2012    | 43796(79.1)                | 35630(84.1)                             | 44079(81.6)                | 36431(86.6)                             | 17378(83.5)                | 14375(87.5)                             | 4344(86)                   | 3592(89.6)                              | 758(86.5)                  | 627(89.2)                               |
| 2013    | 52487(78.6)                | 42929(84)                               | 54011(81.6)                | 44580(86.8)                             | 21734(83.5)                | 18108(88.3)                             | 5713(86.2)                 | 4743(90.3)                              | 1030(88)                   | 859(91.3)                               |
| 2014    | 57319(80.1)                | 47282(84.8)                             | 56971(82.4)                | 48991(87.3)                             | 23319(83.3)                | 20279(88.2)                             | 6350(86.2)                 | 5508(90)                                | 1093(86.8)                 | 956(89.9)                               |
| 2015    | 68117(81.8)                | 55257(85.9)                             | 69751(83.6)                | 59926(87.9)                             | 29112(83.4)                | 25722(87.8)                             | 8193(86)                   | 7205(89.4)                              | 1423(85.8)                 | 1254(87.8)                              |
| 2016    | 77273(82)                  | 61548(86.6)                             | 83128(83.6)                | 71222(88.7)                             | 36529(83.8)                | 32327(88.8)                             | 10657(85.8)                | 9387(90.3)                              | 1925(86.4)                 | 1701(91)                                |
| 2017    | 82018(83)                  | 66293(87.3)                             | 91470(84.4)                | 79769(89.2)                             | 42337(84.4)                | 38080(89.4)                             | 12542(86.8)                | 11298(90.7)                             | 2367(88.7)                 | 2122(92.1)                              |
| 2018    | 63508(84.2)                | 56275(87.3)                             | 75472(85.9)                | 70723(89.3)                             | 36078(86.2)                | 34663(89.6)                             | 10810(87.2)                | 10408(90.3)                             | 2147(89.9)                 | 2052(92.7)                              |
| Overall | 550488(81.1)               | 442367(85.3)                            | 575415(83.4)               | 485770(87.8)                            | 245125(84.4)               | 211845(88.6)                            | 67820(86.5)                | 58910(90.1)                             | 12245(87.9)                | 10701(90.8)                             |



**Supplement Table 6:** Summary of sensitivity analysis due to choice of linkage methods and resulting cohort characteristics

| Linkage method                         | Number of unique individuals | Median (IQR) tests |
|----------------------------------------|------------------------------|--------------------|
| Deterministic: Full name               | 478,560                      | 7 (4, 10)          |
| Deterministic: Existing ID             | 508,955                      | 6 (3, 9)           |
| Deterministic + Probabilistic (JW=1)   | 476,080                      | 7 (4, 10)          |
| Deterministic + Probabilistic (JW=0.9) | 474,595                      | 7 (4, 10)          |
| Deterministic + Probabilistic (JW=0.8) | 469,565                      | 7 (4, 10)          |
| Deterministic + Probabilistic (JW=0.7) | 465,457                      | 7 (4, 10)          |
| Deterministic + Probabilistic (JW=0.6) | 463,476                      | 7 (4, 10)          |
| Deterministic + Probabilistic (JW=0.5) | 462,859                      | 7 (4, 10)          |

**Supplement Table 7:** Estimated population viral suppression rate for all people living with HIV in the Western Cape using VL<400 as threshold

| Year  | End of year populations <sup>^</sup> | Total HIV Prevalence <sup>#</sup> | HIV infected population | VL<400 Copies/ mL | Proportion virally suppressed <sup>^^</sup> |
|-------|--------------------------------------|-----------------------------------|-------------------------|-------------------|---------------------------------------------|
| 2008  | 5308512                              | 4,9%                              | 261332                  | 31095             | 11.9%                                       |
| 2009  | 5288519                              | 5,2%                              | 275266                  | 47761             | 17.4%                                       |
| 2010  | 5254963                              | 5,5%                              | 287057                  | 58904             | 20.5%                                       |
| 2011  | 5455552                              | 5,7%                              | 310433                  | 79031             | 25.5%                                       |
| 2012  | 5819473                              | 5,9%                              | 342790                  | 101803            | 29.7%                                       |
| 2013  | 6063550                              | 6,1%                              | 368182                  | 124120            | 33.7%                                       |
| 2014  | 6157898                              | 6,2%                              | 383989                  | 137261            | 35.7%                                       |
| 2015  | 6222410                              | 6,4%                              | 397189                  | 166253            | 41.9%                                       |
| 2016  | 6396236                              | 6,5%                              | 416515                  | 194069            | 46.6%                                       |
| 2017  | 6564961                              | 6,6%                              | 434634                  | 216991            | 49.9%                                       |
| 2018* | 6655523                              | 6,7%                              | 446303                  | 190485            | 42.7%                                       |

<sup>^</sup> Interpolated from SA mid-year population estimates [2-12]  
<sup>\*</sup> Estimates for the end of September 2018  
<sup>#</sup> Obtained from the Thembisa model [13]  
<sup>^^</sup> Assumes those not in care have VL>400 cps/mL

**Supplement Table 8:** Estimated population viral suppression rate (VL<1000) for all people living with HIV in the Western Cape by linkage method

| Year | Deterministic |             | Deterministic + Probabilistic |       |       |       |       | No Linkage |       |
|------|---------------|-------------|-------------------------------|-------|-------|-------|-------|------------|-------|
|      | Full name     | Existing ID | 1                             | 0,9   | 0,8   | 0,7   | 0,6   |            | 0,5   |
| 2008 | 12.1%         | 12.4%       | 12.3%                         | 12.3% | 12.2% | 12.2% | 12.2% | 12.1%      | 14.3% |
| 2009 | 17.7%         | 19.0%       | 18.0%                         | 18.0% | 17.9% | 17.9% | 17.7% | 17.6%      | 20.9% |
| 2010 | 20.3%         | 20.0%       | 20.4%                         | 20.4% | 20.4% | 20.3% | 20.1% | 20.0%      | 23.8% |
| 2011 | 25.8%         | 25.6%       | 26.1%                         | 26.1% | 26.0% | 25.9% | 25.7% | 25.6%      | 30.8% |
| 2012 | 30.0%         | 30.2%       | 30.4%                         | 30.4% | 30.4% | 30.3% | 30.2% | 30.1%      | 35.0% |
| 2013 | 33.9%         | 34.3%       | 34.5%                         | 34.4% | 34.4% | 34.4% | 34.3% | 34.2%      | 39.6% |
| 2014 | 35.9%         | 36.5%       | 36.5%                         | 36.5% | 36.5% | 36.4% | 36.3% | 36.3%      | 41.8% |
| 2015 | 42.3%         | 42.6%       | 42.8%                         | 42.8% | 42.7% | 42.7% | 42.6% | 42.5%      | 48.4% |
| 2016 | 46.7%         | 47.3%       | 47.6%                         | 47.6% | 47.6% | 47.5% | 47.4% | 47.3%      | 53.3% |
| 2017 | 49.9%         | 50.8%       | 51.0%                         | 51.0% | 50.9% | 50.9% | 50.8% | 50.7%      | 56.7% |
| 2018 | 42.8%         | 43.5%       | 43.6%                         | 43.6% | 43.6% | 43.5% | 43.5% | 43.4%      | 48.4% |

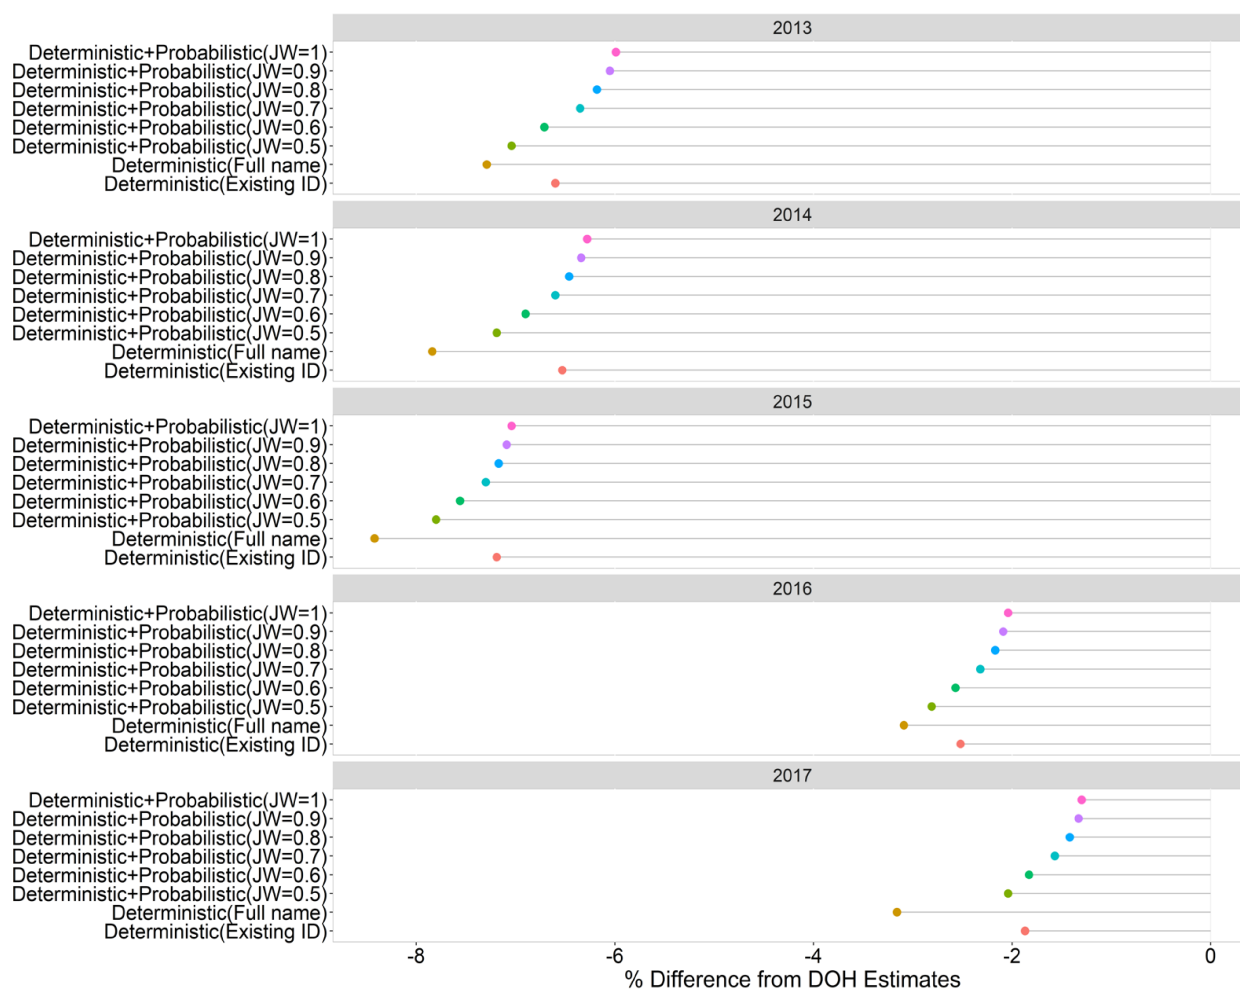

**Supplement Figure 1:** Percentage difference of the number of individuals estimated to be living with HIV and in care in the public sector from the linkage algorithms and those reported by the Western Cape DOH [14] and linkage algorithms. Estimates obtained from a combination of Deterministic and Probabilistic linkage were closest to those given in the DOH reports for each of the years available. Deterministic linkage only yields estimates that are furthest from the DOH estimates.

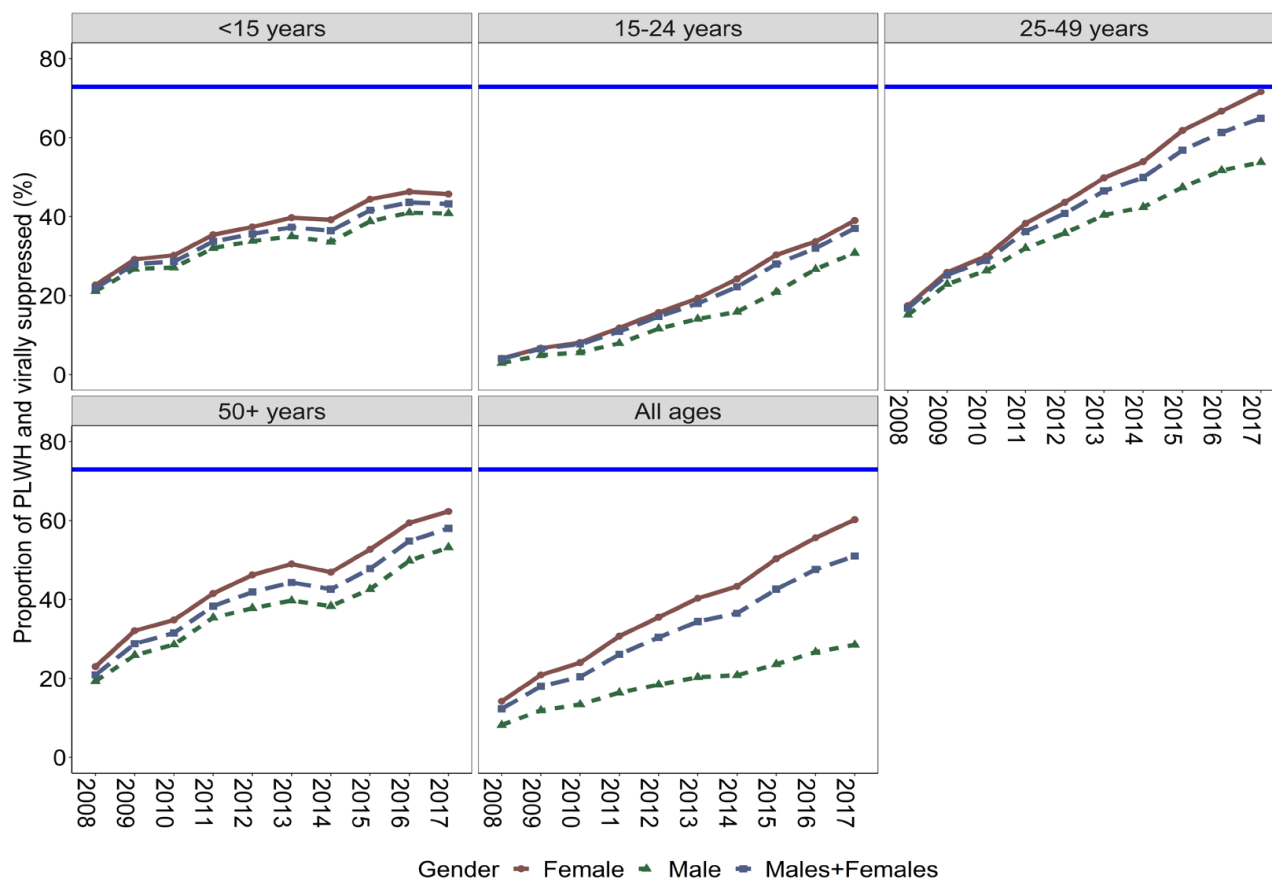

**Supplement Figure 2 :** Estimated population viral suppression in the Western Cape, South Africa using routinely collected viral load data (2008 - 2017). This figure gives the estimated proportion of individuals living with HIV (PLWH) who were virally suppressed in the Western Cape, South Africa. Estimates were obtained from a combination of routinely collected viral load data and model-based estimates. Population viral suppression estimates were disaggregated by age (< 15 years, 15-24 years, 25-49 years, >=50 years, All ages), and sex (Male, Female, Males + Females). The blue horizontal line represents the overall 90-90-90 target (72.9%).

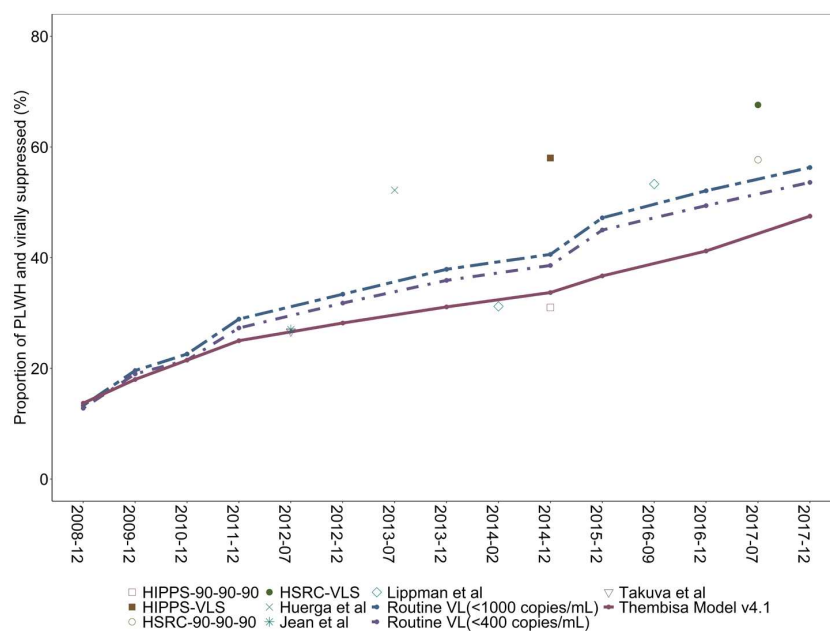

**Supplement Figure 3:** Method based estimation of population viral suppression among all females living with HIV (PLWH) in the Western Cape (dashed lines), compared to mathematical model based (purple solid line) and cross-sectional survey estimates (points) from 2008 - 2017.

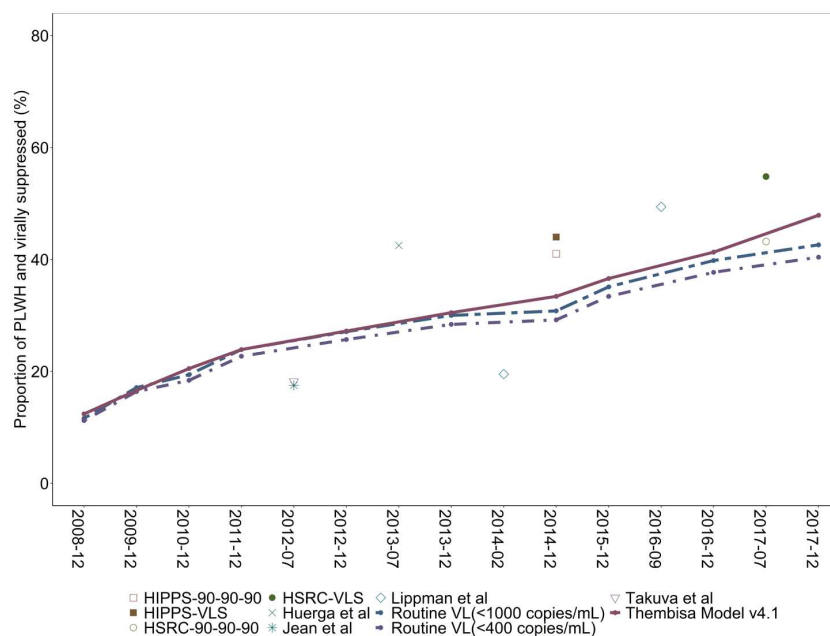

**Supplement Figure 4:** Method based estimation of population viral suppression among all males living with HIV (PLWH) in the Western Cape (dashed lines), compared to mathematical model based (purple solid line) and cross-sectional survey estimates (points) from 2008 - 2017.

**References for online supplement**

1. Winkler WE. Overview of Record Linkage and Current Research Directions. Washington DC: Statistical Research Division, U.S. Census Bureau;2006.
2. Statistics South Africa. Mid-year population estimates, 2019. In: Statistics South Africa, ed. Pretoria: Statistics South Africa; 2019.
3. Statistics South Africa. Mid-year population estimates, 2018. In: Statistics South Africa, ed. Pretoria: Statistics South Africa; 2018.
4. Statistics South Africa. Mid-year population estimates, 2017. In: Statistics South Africa, ed. Pretoria: Statistics South Africa; 2017.
5. Statistics South Africa. Mid-year population estimates, 2016. In: Statistics South Africa, ed. Pretoria: Statistics South Africa; 2016.
6. Statistics South Africa. Mid-year population estimates, 2015. In: Statistics South Africa, ed. Pretoria: Statistics South Africa; 2015.
7. Statistics South Africa. Mid-year population estimates, 2014. In: Statistics South Africa, ed. Pretoria: Statistics South Africa; 2014.
8. Statistics South Africa. Mid-year population estimates, 2013. In: Statistics South Africa, ed. Pretoria: Statistics South Africa; 2013.
9. Statistics South Africa. Mid-year population estimates, 2011. In: Statistics South Africa, ed. Pretoria: Statistics South Africa; 2011.
10. Statistics South Africa. Mid-year population estimates, 2010. In: Statistics South Africa, ed. Pretoria: Statistics South Africa; 2010.
11. Statistics South Africa. Mid-year population estimates, 2009. In: Statistics South Africa, ed. Pretoria: Statistics South Africa; 2009.
12. Statistics South Africa. Mid-year population estimates, 2008. In: Statistics South Africa, ed. Pretoria: Statistics South Africa; 2008.
13. Johnson LF, Chiu C, Myer L, et al. Prospects for HIV control in South Africa: a model-based analysis. *Glob Health Action*. 2016;9:30314.
14. Western Cape Government Health. Western Cape Government Health, Annual Report 2017/2018. Cape Town.2018
